# Supplementary material for: Enhanced adsorption of Cu(ii) ions on chitosan microspheres functionalized with polyethylenimine-conjugated poly(glycidyl methacrylate) brushes
Source: Royal Society of Chemistry journal article supplement (doi:10.1039/c6ra16226f), 2016-01-01
Supplement: c6ra16226f1.pdf [file c6ra16226f1.pdf]

## Supplementary Information

### Enhanced Adsorption of Cu(II) Ions on the Chitosan Microspheres Functionalized with Polyethylenimine-conjugated Poly(glycidyl methacrylate) Brushes

**Lv Li,<sup>a,#</sup> Jing Zhang,<sup>a,#</sup> Shaojun Yuan,<sup>a,\*</sup> Liqiang Huang,<sup>a</sup> Shengwei Tang,<sup>a</sup> Bin  
Liang,<sup>a</sup> Simo O Pehkonen,<sup>b</sup>**

<sup>a</sup>Multi-phases Mass Transfer & Reaction Engineering Lab,  
College of Chemical Engineering, Sichuan University,  
Chengdu 610065, China

<sup>b</sup>Department of Environmental Sciences,  
University of Eastern Finland, 70211 Kuopio, Finland

---

# These two authors contributed equally.

\*To whom all correspondence should be addressed

Tel: +86-28-85990133, Fax: +86-28-85460556

E-mail: [yuanshaojun@gmail.com](mailto:yuanshaojun@gmail.com) (S.J. Yuan)

## S1. Experimental

### 1.1 Grafting density of PGMA brushes onto the CCS microspheres

The grafting yield (GY) and grafting density (GD) of the PGMA brushes onto the CCS microspheres via SI-ATRP can be precisely controlled by varying reaction time and the initial monomer concentration. The GY and GD values were determined using the previously-reported equations.<sup>1,2</sup> The GY were determined by measuring the increase in the mass percentage of the CCS-*g*-PGMA microspheres as follows:

$$GY = \frac{W_g - W_o}{W_o} \times 100\% \quad (1)$$

where  $W_o$  and  $W_g$  were the weights of the dry CCS microspheres before and after the grafting of PGMA brushes, respectively. The GD of PGMA brushes were determined by the following equation:

$$GD = \frac{(W_g - W_o)/M}{W_o} \times 100\% \quad (2)$$

where  $M$  is the molecular weight of the GMA repeat unit (i.e., 142.15 g·mol<sup>-1</sup>) of the PGMA chains. The GY and GD values were the mean values from at least three replicate measurements.

### 1.2 Effect of solution pH

To determine the optimal solution pH for the CCS-*g*-PGMA2-*c*-PEI microspheres from 4 h of ATRP reaction, the adsorption profiles of Cu(II) ion in an initial solution pH range of 1.0 –6.0 was investigated. An aliquot 100 mg of the CCS microspheres was immersed in 200 mL of Cu(II) ions with an initial concentration of 0.2 mmol·L<sup>-1</sup> (i.e. 13 mg·L<sup>-1</sup>), and the adsorption was allowed to proceed at 150 rpm and 25°C for 24 h. The solution pH was adjusted by adding 0.1 mol·L<sup>-1</sup> HNO<sub>3</sub> or NaOH solution every 2 h to remain relatively constant throughout the adsorption experiment. The equilibrium adsorption capacity was calculated by the following

equation:<sup>3</sup>

$$q_e = \frac{(C_o - C_e) \cdot v}{m} \quad (3)$$

where  $q_e$  is the equilibrium adsorption capacity ( $\text{mg}\cdot\text{g}^{-1}$ ),  $C_o$  and  $C_e$  are the concentrations of the initial Cu(II) solution and the final solution at equilibrium, respectively,  $m$  is the mass of the CCS microspheres (g), and  $v$  is the solution volume (L), which remained constant throughout the adsorption period.

### 1.3 Adsorption kinetics

To determine the adsorption kinetics of Cu(II) ions, a aliquot 100 mg of CCS-g-PGMA2-*c*-PEI microspheres was immersed in 200 mL of Cu(II) solution with an initial concentration of  $0.2 \text{ mmol}\cdot\text{L}^{-1}$  (i.e.  $13 \text{ mg}\cdot\text{L}^{-1}$ ). The initial solution pH values was 5.0, and no pH adjustment was performed throughout the adsorption process. The adsorption of Cu(II) ions on the pristine and functionalized CCS microspheres was allowed to proceed at  $25^\circ\text{C}$  at 150 rpm for a predetermined period. The residual concentration of Cu(II) ions was analyzed by taking 1.0 mL aliquot of the Cu(II) solution at different time intervals. The adsorbed amounts of Cu(II) ions per unit weight of the microspheres at time  $t$ ,  $q_t$  ( $\text{mg}\cdot\text{g}^{-1}$ ), were calculated from the following equation:<sup>4</sup>

$$q_t = \frac{(C_o - C_t) \cdot V}{m} \quad (4)$$

where  $C_o$  and  $C_t$  correspond to the initial concentration of Cu(II) ions and the Cu(II) concentration at time  $t$  ( $\text{mg}\cdot\text{L}^{-1}$ ), respectively.  $v$  is the volume of the residual volume at time  $t$ , and  $m$  is the weight of the microspheres added.

### 1.4 Adsorption isotherms

The adsorption isotherms were obtained by varying adsorption temperatures of 25, 35, 45, and  $55^\circ\text{C}$ . The adsorption solution pH was adjusted at  $5.0 \pm 0.1$

throughout the experimental periods with a series of initial concentration of Cu(II) from  $C_0 = 0.1 - 2.2 \text{ mmol}\cdot\text{L}^{-1}$  (i.e.  $6.5 - 140 \text{ mg}\cdot\text{L}^{-1}$ ). At a predetermined temperature, an aliquot 100 mg of the CCS-g-PGMA2-c-PEI microspheres were added into 200 mL of Cu(II) solutions under continuous stirring at 150 rpm for 2 h. The adsorption amount of Cu(II) ions onto the microspheres at equilibrium was calculated from the above Equation 3.

### **1.6 Competitive adsorption of the coexisting heavy metal ions**

To determine the effect of coexisting heavy metal ions on the adsorption behavior of Cu(II) ions on the microspheres, the competition adsorption experiment was conducted in a quinary ion system with Pb(II), Cu(II), Mg(II) and Ca(II) ions as the coexisting heavy metal ions. Typically, a 100 mg aliquot of the CCS-g-PGMA2-c-PEI microspheres was added to 200 mL of the quinary heavy metal ion solution at 25°C and at 150 rpm for 24 h. The initial concentration of each heavy metal ion was  $0.2 \text{ mmol}\cdot\text{L}^{-1}$ , i.e., 41, 13, 8 and  $4.9 \text{ mg}\cdot\text{L}^{-1}$  for Pb(II), Cu(II), Ca(II) and Mg(II) ions, respectively. The solution pH value remained constant at  $5.0 \pm 0.1$  throughout the adsorption periods by adjusting with  $0.1 \text{ mol}\cdot\text{L}^{-1}$  HNO<sub>3</sub> or NaOH solution for every 2 h.

### **1.7 Regeneration and recycle of the CCS-g-PGMA2-c-PEI microspheres**

To regenerate the Cu(II)-adsorbed CCS microspheres for recycle use, the desorption of the CCS microspheres was performed in a  $1 \text{ mol}\cdot\text{L}^{-1}$  EDTA solution. The adsorption experiments were carried out by adding 100 mg of the microspheres in 200 ml of  $0.2 \text{ mmol}\cdot\text{L}^{-1}$  (i.e.,  $13 \text{ mg}\cdot\text{L}^{-1}$ ) Cu(II) solution with pH at 5.0 at 25 °C for 2 h. The desorption of the Cu(II)-loaded CCS microspheres was conducted in 50 mL of  $1 \text{ mol}\cdot\text{L}^{-1}$  EDTA solution at 25 °C at 150 rpm for 1 h. The sorption-desorption experiments were conducted for five cycles to evaluate the regeneration capacity of

the functionalized CCS microspheres.

## S2. Results and Discussion

Table S1 Comparison adsorption of Cu(II) ions on the PEI-modified adsorbents

| Adsorbents                                | Equilibrium time (min) | C <sub>0</sub> (ppm) | pH values | q <sub>max</sub> (mmol·g <sup>-1</sup> ) | Refs       |
|-------------------------------------------|------------------------|----------------------|-----------|------------------------------------------|------------|
| PP-g-PEI                                  | 180                    | 20-100               | 6         | 1.88                                     | 5          |
| PEI-modified magnetic porous powder       | 10                     | 100-600              | 6.5       | 2.47                                     | 6          |
| PEI-modified magnetic graphene oxides     | 30                     | 10-350               | 5         | 2.46                                     | 7          |
| PEI-coated Fe <sub>3</sub> O <sub>4</sub> | 60                     | 50                   | 5.5       | 2.50                                     | 8          |
| PEI-modified biomass                      | 240                    | 20-500               | 5.5       | 1.44                                     | 9          |
| PEI-immobilized PMMA microspheres         | 30                     | 50-600               | 5.5       | 0.22                                     | 10         |
| PEI-grafted resin                         | 1200                   | 128                  | 5         | 2.60                                     | 11         |
| PEI-modified aerobic granular sludge      | 180                    | 10-500               | 6         | 1.11                                     | 12         |
| PEI-c-PGMA-modified CCS microspheres      | 120                    | 6.5-140              | 5         | 3.58                                     | This study |

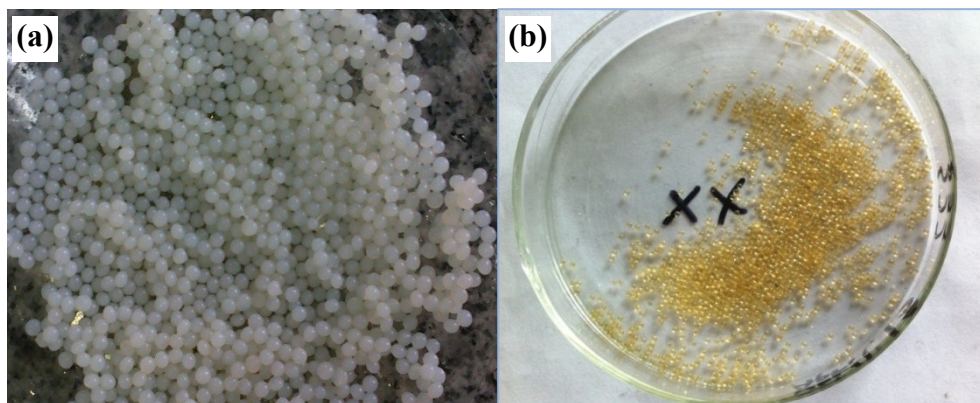

**Fig. S1** The optical images of the (a) wet hydrogel and (b) dry crosslinked chitosan (CCS) microspheres.

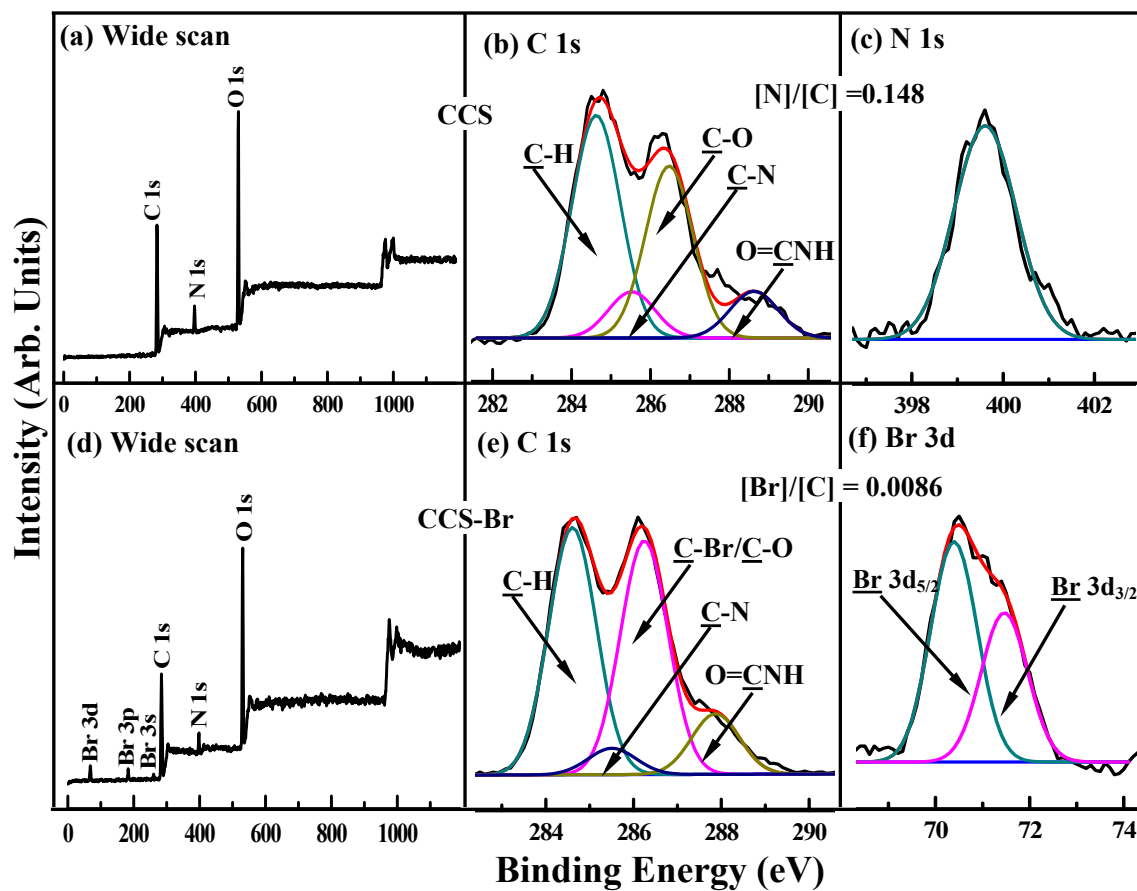

**Fig. S2** The wide scan, C 1s and N 1s (or Br 3d) core-level XPS spectra of the surfaces for the (a,b,c) CCS and (d,e,f) CCS-Br microspheres.

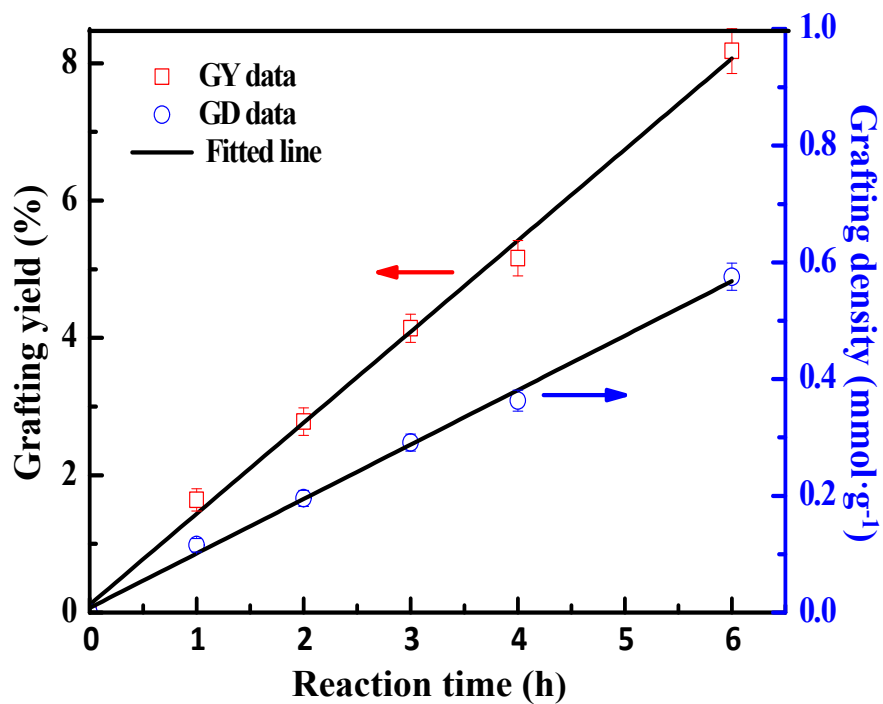

**Fig. S3** A linear relationship of the grafting yield (GY) and grafting density (GD) for the PGMA brushes formed on the surfaces of the CCS-g-PGMA microspheres as a function of ATRP reaction time.



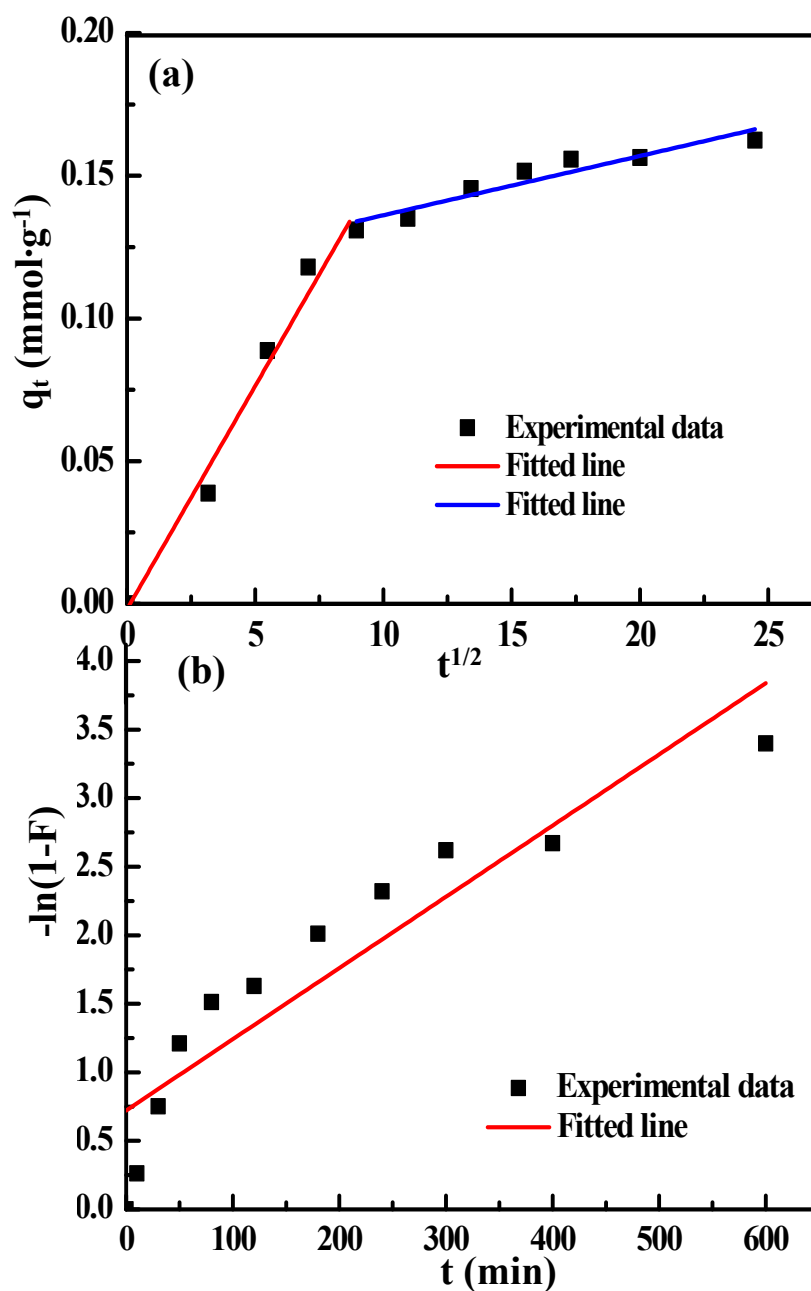

**Fig. S4** The diffusion-based model-fitted adsorption kinetics of Cu(II) ions on the pristine CCS microspheres at the initial pH value of 5.0: (a) Weber-Morris and (b) Boyd. Experimental conditions:  $C_0 = 0.2 \text{ mmol}\cdot\text{L}^{-1}$  (i.e.  $12.7 \text{ mg}\cdot\text{L}^{-1}$ ),  $v = 200 \text{ mL}$ ,  $T = 298.15 \text{ K}$ , and  $m = 100 \text{ mg}$ .

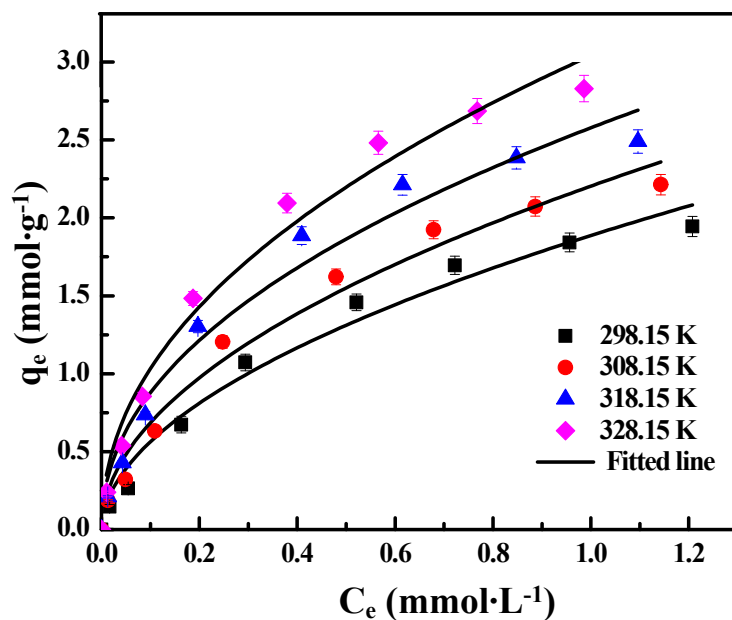

**Fig. S5** Freundlich-fitted adsorption isotherms of  $\text{Cu}^{2+}$  ions on the CCS-*g*-PGMA2-*c*-PEI microspheres at different adsorption temperatures of 298.15, 308.15, 318.15 and 328.15 K. Experimental conditions:  $C_0 = 0.1 - 2.2 \text{ mmol}\cdot\text{L}^{-1}$  (i.e.  $6.35 - 139.7 \text{ mg}\cdot\text{L}^{-1}$ ),  $v = 200 \text{ mL}$ ,  $m = 100 \text{ mg}$ , adsorption time = 2 h, and pH = 5.0.

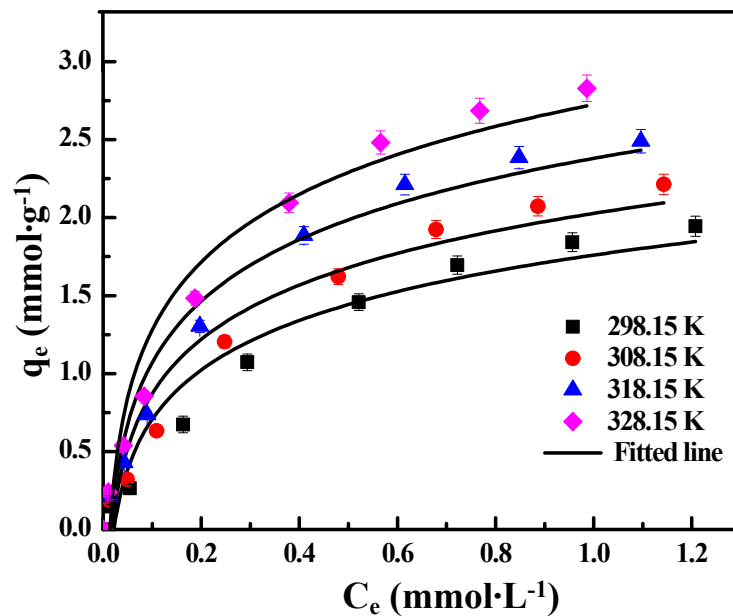

**Fig. S6** Temkin-fitted adsorption isotherms of  $\text{Cu}^{2+}$  ions on the CCS-g-PGMA2-*c*-PEI microspheres at different adsorption temperatures of 298.15, 308.15, 318.15 and 328.15 K. Experimental conditions:  $C_0 = 0.1 - 2.2 \text{ mmol}\cdot\text{L}^{-1}$  (i.e. 6.35 – 139.7  $\text{mg}\cdot\text{L}^{-1}$ ),  $v = 200 \text{ mL}$ ,  $m = 100 \text{ mg}$ , adsorption time = 2 h, and pH = 5.0.

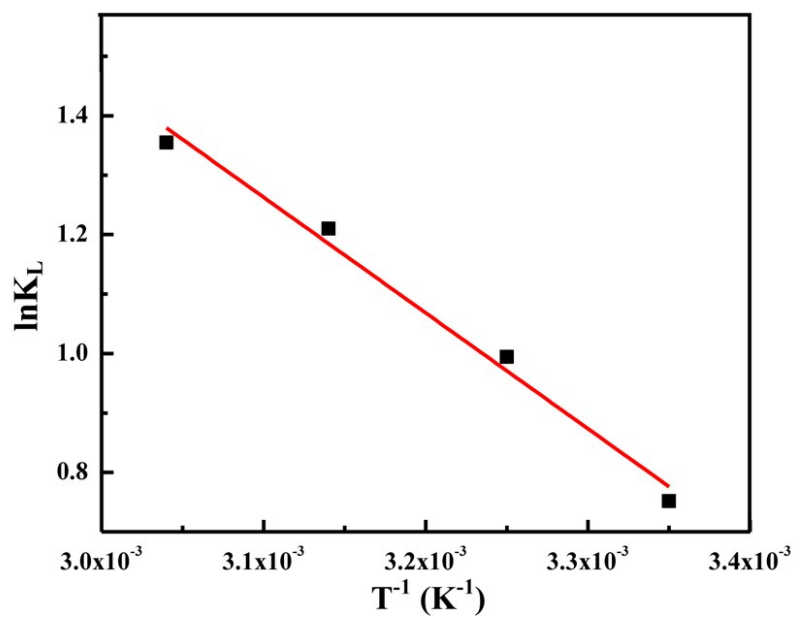

**Fig. S7** Van't Hoff plot for the adsorption of  $Cu^{2+}$  ions on the CCS-g-PGMA2-*c*-PEI microspheres.

## Reference

1. Yuan, S. J.; Xiong, G. M.; Wang, X. Y.; Zhang, S.; Choong, C., Surface modification of polycaprolactone substrates using collagen-conjugated poly (methacrylic acid) brushes for the regulation of cell proliferation and endothelialisation. *J. Mater. Chem.* **2012**, *22* (26), 13039-13049.
2. Barbey, R.; Lavanant, L.; Paripovic, D.; Schüwer, N.; Sugnaux, C.; Tugulu, S.; Klok, H. A., Polymer brushes via surface-initiated controlled radical polymerization: synthesis, characterization, properties, and applications. *Chem. Rev.* **009**, *109* (11), 5437-5527.
3. Zhang, X.; Li, G.; Zhang, H.; Wang, X.; Qu, J.; Liu, P.; Wang, Y., Enhanced adsorption capacity and selectivity towards salicylic acid in water by a cationic polymer functionalized 3-D ordered macroporous adsorbent. *Soft Matter* **2013**, *9* (26), 6159.
4. Jiang, M.; Wang, J.; Li, L.; Pan, K.; Cao, B., Poly(N,N-dimethylaminoethyl methacrylate) modification of a regenerated cellulose membrane using ATRP method for copper(ii) ion removal. *RSC Adv.* **2013**, *3* (43), 20625.
5. Li, T.; Chen, S.; Li, H.; Li, Q.; Wu, L., Preparation of an ion-imprinted fiber for the selective removal of Cu<sup>2+</sup>. *Langmuir* **2011**, *27* (11), 6753-6758.
6. Pang, Y.; Zeng, G.; Tang, L.; Zhang, Y.; Liu, Y.; Lei, X.; Li, Z.; Zhang, J.; Xie, G., PEI-grafted magnetic porous powder for highly effective adsorption of heavy metal ions. *Desalination* **2011**, *281*, 278-284.
7. Sui, N.; Wang, L.; Wu, X.; Li, X.; Sui, J.; Xiao, H.; Liu, M.; Wan, J.; William, W. Y., Polyethylenimine modified magnetic graphene oxide nanocomposites for Cu<sup>2+</sup> removal. *RSC Adv.* **2015**, *5* (1), 746-752.
8. Goon, I. Y.; Zhang, C.; Lim, M.; Gooding, J. J.; Amal, R., Controlled fabrication of polyethylenimine-functionalized magnetic nanoparticles for the sequestration and quantification of free Cu<sup>2+</sup>. *Langmuir* **2010**, *26* (14), 12247-12252.
9. Deng, S.; Ting, Y.-P., Characterization of PEI-modified biomass and biosorption of Cu (II), Pb (II) and Ni (II). *Water Res.* **2005**, *39* (10), 2167-2177.
10. Duru, P. E.; Bektas, S.; Patir, S.; Denizli, A., Adsorption of heavy-metal ions on poly (ethylene imine)-immobilized poly (methyl methacrylate) microspheres. *J. Appl. Polym. Sci.* **2001**, *81* (1), 197-205.
11. Niu, L.; Deng, S.; Yu, G.; Huang, J., Efficient removal of Cu (II), Pb (II), Cr (VI) and As (V) from aqueous solution using an aminated resin prepared by surface-initiated atom transfer radical polymerization. *Chem. Eng. J.* **2010**, *165* (3), 751-757.
12. Sun, X.-F.; Liu, C.; Ma, Y.; Wang, S.-G.; Gao, B.-Y.; Li, X. M., Enhanced Cu (II) and Cr (VI) biosorption capacity on poly (ethylenimine) grafted aerobic granular sludge. *Colloid Surf. B* **2011**, *82* (2), 456-462.
